# Supplementary material for: Breakfast Skipping is Positively Associated With Incidence of Type 2 Diabetes Mellitus: Evidence From the Aichi Workers’ Cohort Study
Source: PubMed Central journal article supplement (PMC4411234; doi:10.2188/jea.je20140109), 2015-05-05
Supplement: je-25-351-s001.pdf [file je-25-351-s001.pdf]

## 朝食欠食は2型糖尿病発症と関連する—愛知職域コホート研究の結果から

上村 真由<sup>1</sup>、八谷 寛<sup>1,2</sup>、イサヤス ハレゴットウ ヒラウエ<sup>1</sup>、李 媛英<sup>2</sup>、  
王 超辰<sup>1</sup>、江 啓発<sup>1</sup>、大塚 礼<sup>3</sup>、豊嶋 英明<sup>4</sup>、玉腰 浩司<sup>5</sup>、青山 温子<sup>1</sup>

<sup>1</sup> 名古屋大学大学院医学系研究科 国際保健医療学・公衆衛生学

<sup>2</sup> 藤田保健衛生大学医学部 公衆衛生学

<sup>3</sup> 国立長寿医療研究センター 長期縦断疫学研究 (NILS-LSA) 活用研究室

<sup>4</sup> 安城更生病院

<sup>5</sup> 名古屋大学大学院医学系研究科 看護学専攻

背景：朝食欠食が2型糖尿病 (T2DM) の危険因子であるかもしれないことが示唆されているが、この関連性は民族間や男女によって一致しておらず、また、日本人では十分な検討がされていない。

方法：2002年に35-66歳の某自治体職員4631名（男性3600名、女性1031名）を対象とし、T2DM発症を2011年まで追跡した。朝食の摂取頻度は、自記式アンケートで調査し、週の摂取頻度が3-5回以下の者を朝食欠食者とした。朝食欠食と糖尿病発症との関連は、食事要因や喫煙、その他の生活習慣、ベースライン時のbody mass index (BMI) 及び空腹時血糖 (FBG) 値を調整したCox比例ハザードモデルで解析した。

結果：8.9年の追跡期間中に、285名（男性231名、女性54名）がT2DMを発症した。朝食を「必ず毎日食べる」と回答した者を基準とした、朝食を「ほぼ毎日食べるが時々食べない」、「週3-5日食べる」、「週1-2日食べる」、「食べない」と回答した者のT2DM発症のハザード比 (95%信頼区間) は、その順に1.06 (0.73-1.53)、2.07 (1.20-3.56)、1.37 (0.82-2.29)、2.12 (1.19-3.76) であった。また、朝食欠食者は、朝食摂取者に比べ、T2DM発症のハザード比が有意に高値であった (ハザード比: 1.73、95%信頼区間: 1.24-2.42)。朝食欠食とT2DM発症率の正の関連は、男女、現喫煙者かどうか、過体重 (BMI  $\geq 25\text{kg/m}^2$ ) の有無、空腹時高血糖 ( $110 \leq \text{FBG} < 126\text{mg/dl}$ ) の有無によらず、全ての層において認められた (朝食欠食と各層化変数の交互作用項の  $P > 0.05$ )。

結論：中高年日本人男女を対象とした本研究結果から、朝食欠食が他の生活習慣やベースラインのBMI及びFBG値に独立してT2DM発症リスクを高めることが示唆された。

キーワード：朝食、糖尿病、コホート研究、日本
